1 **Tracking the temporal variation of COVID-19 surges through wastewater-based**  
2 **epidemiology during the peak of the pandemic: a six-month long study in Charlotte, North**  
3 **Carolina**

4 Authors: Visva Bharati Barua<sup>a\*</sup>, Md Ariful Islam Juel<sup>a\*</sup>, A. Denene Blackwood<sup>b</sup>, Thomas  
5 Clerkin<sup>b</sup>, Mark Ciesielski<sup>b</sup>, Adeola Julian Sorinolu<sup>a</sup>, David A. Holcomb<sup>c</sup>, Isaiah Young<sup>a</sup>, Gina  
6 Kimble<sup>d</sup>, Shannon Sypolt<sup>d</sup>, Lawrence S. Engel<sup>c</sup>, Rachel T. Noble<sup>b</sup>, Mariya Munir<sup>a</sup>

7 <sup>a</sup>Department of Civil and Environmental Engineering, University of North Carolina Charlotte,  
8 9201 University City Boulevard, Charlotte, NC 28223, USA

9 <sup>b</sup>Institute of Marine Sciences, The University of North Carolina at Chapel Hill, Morehead City,  
10 NC 28557, USA

11 <sup>c</sup>Department of Epidemiology, Gillings School of Global Public Health, The University of North  
12 Carolina at Chapel Hill, Chapel Hill, NC 27599, USA

13 <sup>d</sup>Charlotte Water, 5100 Brookshire Blvd., Charlotte, NC 28216, USA

14 \* These authors contributed equally

15 Corresponding author: Dr. Mariya Munir ([mmunir@uncc.edu](mailto:mmunir@uncc.edu))

16

17 **ABSTRACT**

18 The global spread of SARS-CoV-2 has continued to be a serious concern after WHO declared  
19 the virus the causative agent of the coronavirus disease 2019 (COVID-19) a global pandemic.

20 Monitoring of wastewater is a useful tool for assessing community prevalence given that fecal  
21 shedding of SARS-CoV-2 occurs in high concentrations by infected individuals, regardless of  
22 whether they are asymptomatic or symptomatic. Using tools that are part of the wastewater-  
23 based epidemiology (WBE) approach, combined with molecular analyses, wastewater

24 monitoring becomes a key piece of information used to assess trends and quantify the scale and  
25 dynamics of COVID-19 infection in a specific community, municipality, or area of service. This  
26 study investigates a six-month long SARS-CoV-2 RNA quantification in influent wastewater  
27 from four municipal wastewater treatment plants (WWTP) serving the Charlotte region of North  
28 Carolina (NC) using both RT-qPCR and RT-ddPCR platforms. Influent wastewater was analyzed  
29 for the nucleocapsid (N) genes N1 and N2. Both RT-qPCR and RT-ddPCR performed well for  
30 detection and quantification of SARS-CoV-2 using the N1 target, while for the N2 target RT-  
31 ddPCR was more sensitive. SARS-CoV-2 concentration ranged from  $10^3$  to  $10^5$  copies/L for all  
32 four plants. Both RT-qPCR and RT-ddPCR showed a significant moderate to a strong positive  
33 correlation between SARS-CoV-2 concentrations and the 7-day rolling average of clinically  
34 reported COVID-19 cases using a lag that ranged from 7 to 12 days. A major finding of this  
35 study is that despite small differences, both RT-qPCR and RT-ddPCR performed well for  
36 tracking the SARS-CoV-2 virus across WWTP of a range of sizes and metropolitan service  
37 functions.

38 **Graphical Abstract**

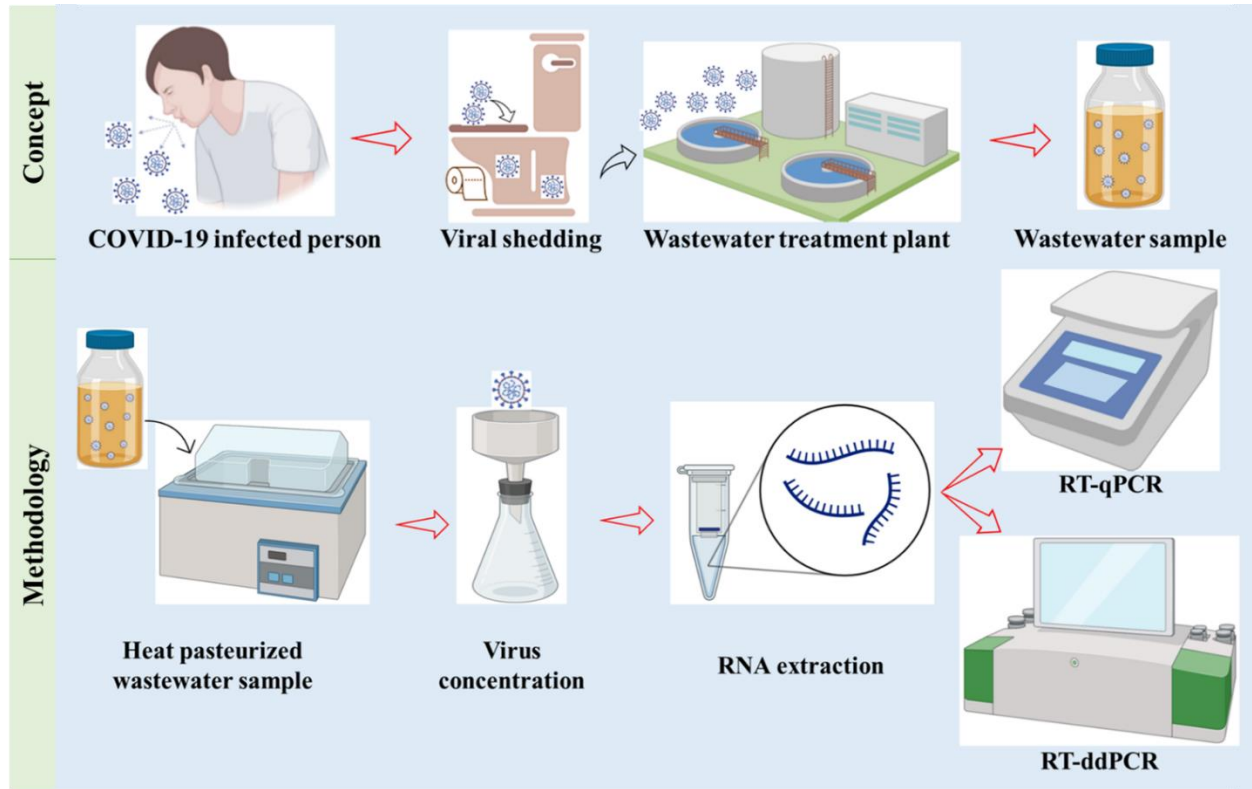

39  
40  
41

42 **Keywords:** SARS-CoV-2; wastewater; COVID-19; RT-qPCR; RT-ddPCR; wastewater-based  
43 epidemiology (WBE)

## 44 1. Introduction

45 The global pandemic “Coronavirus disease 2019 (COVID-19)”, as declared by the World Health  
46 Organization (WHO, 2020a), is caused by the virus given the name "Severe Acute Respiratory  
47 Syndrome Coronavirus 2" (SARS-CoV-2). The single-stranded ribonucleic acid (RNA) SARS-  
48 CoV-2 virus can infect individuals causing a range of symptoms, which can include life-  
49 threatening health complications on one end of the spectrum or a lack of symptoms  
50 (asymptomatic carriers). Interestingly, both symptomatic and asymptomatic individuals have the  
51 potential to spread the virus to others in the population (Bai et al., 2020). This makes tracking  
52 infected individuals and implementing appropriate preventative measures difficult.

53 During the onset of the COVID-19 pandemic, clinical testing was restricted primarily to  
54 individuals exhibiting life-threatening health complications owing to limited COVID-19 clinical  
55 testing kits (CDC, 2020). Thus, many asymptomatic and even symptomatic individuals were  
56 excluded from the COVID-19 case counts when public health decisions were made (Murakami  
57 et al., 2020) during the early stages of the pandemic. Although later stages of the pandemic have  
58 included testing of asymptomatic individuals, for either surveillance or screening, testing has  
59 been neither comprehensive nor representative. Therefore, clinical testing has been valuable for  
60 managing isolation and quarantine of individuals, but the pooling of clinical testing data has  
61 limited utility for understanding overall trends or inferring the prevalence of infection in entire  
62 communities/counties.

63 Monitoring of SARS-CoV-2 in wastewater influent from municipal wastewater treatment plants  
64 (WWTP) has been demonstrated to be a useful tool for predicting clinical outcomes for whole  
65 communities (Agrawal et al., 2021; Ahmed et al., 2021; Hillary et al., 2021; Saguti et al., 2021).  
66 Wastewater influent is an aggregate measure of the prevalence of infection in a community,  
67 particularly for viral, bacterial and protozoan pathogens that are carried in fecal material. SARS-  
68 CoV-2 RNA concentration in wastewater influent has not only been correlated with reported  
69 COVID-19 cases, but they have been predictive of the clinical testing outcomes in communities  
70 sometimes with as much as a 6 to 14 day lead time (Kumar et al., 2021; Peccia et al., 2020).  
71 Monitoring of influent wastewater has revolutionized the tracking of pathogens in municipalities,  
72 communities, and even small-scale systems such as dormitories and workplaces. Monitoring of  
73 SARS-CoV-2 in wastewater influent includes virus being shed from symptomatic, clinically  
74 diagnosed, and asymptomatic individuals. This area of active research will yield beneficial  
75 information for guiding public health decisions.

76 WBE is a potential approach for understanding the proliferation of SARS-CoV-2 within a  
77 community as the viral RNA is shed by infected individuals into wastewater (Hasan et al., 2021;  
78 Hemalatha et al., 2021). Aoust et al. (2021) reported that the surges in SARS-CoV-2 RNA in  
79 wastewater were observed 48 h prior to clinical testing and 96 h prior to hospitalization.  
80 Wastewater sampling captures the community signal comprising both symptomatic and  
81 asymptomatic individuals (Bivins et al., 2020; Peccia et al., 2020), suggesting the value of WBE  
82 as an impartial surveillance system at a community level when making public health decisions.  
83 To date, numerous studies have documented the detection of SARS-CoV-2 in the influent of  
84 municipal wastewater i.e., Ahmed et al. (2020); Albastaki et al. (2021); Bertrand et al. (2021);  
85 Gonçalves et al. (2021); Kumar et al. (2020); to name a few but their study period ranged from  
86 only 15-30 days. Weidhaas et al. (2021) articulated the need for a meticulous WBE study for  
87 prolonged periods in localities with lower and higher COVID-19 cases to identify the  
88 relationship between concentrations of SARS-CoV-2 RNA in municipal wastewater and rates of  
89 COVID-19 cases in the corresponding communities.

90 This manuscript details a six-month long WBE study for the surveillance of SARS-CoV-2 in the  
91 influent municipal wastewater of Charlotte, North Carolina (NC). The number of clinical cases  
92 of COVID-19 in Mecklenburg County, where Charlotte is located, was highest among all the  
93 counties of NC. The most populous city in NC, Charlotte includes the Charlotte Douglas  
94 International Airport. By December 2020, the number of COVID-19 cases was reported to be  
95 greater than 65,000 in Mecklenburg County (North Carolina Department of Health and Human  
96 Services, NCDHHS). Fig. 1 shows Mecklenburg County where Charlotte is located to report the  
97 highest number of COVID-19 cases in NC. As of September 11, 2021, Mecklenburg County  
98 leads the state in total reported COVID-19 cases with 141,000.

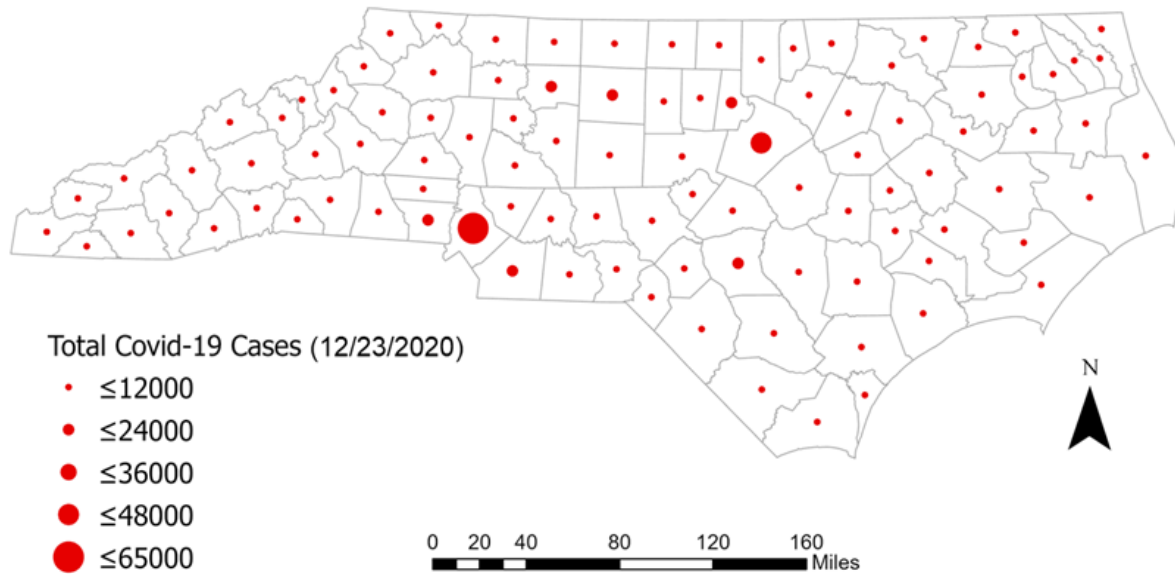

99

100 **Fig.1.** Map showing the total number of clinically reported COVID-19 cases, county-wise, in the  
101 state of NC for the duration of this study (Prepared by the software ArcGIS Pro).

102

103 To date, SARS-CoV-2 wastewater surveillance studies have mostly employed RT-qPCR for viral  
104 quantification (Ahmed, Angel, et al., 2020; Chik et al., 2021; Gerrity et al., 2021; Haramoto et  
105 al., 2020; Medema et al., 2020; Nemudryi et al., 2020; Peccia et al., 2020; Randazzo et al., 2020;  
106 Sherchan et al., 2020; Westhaus et al., 2021; Wurtzer et al., 2020; Zhao et al., 2021) rather than  
107 RT-ddPCR (Gonzalez et al., 2020; Gonzalez et al., 2021). Only a few research groups have used  
108 both RT-qPCR and RT-ddPCR quantification (Aoust, Graber, et al., 2021; Ciesielski et al., 2021;  
109 Dumke et al., 2021; Graham et al., 2021). The study conducted by both Graham et al. (2021) and  
110 Aoust et al. (2021) focussed on RT-qPCR and RT-ddPCR quantification for solids from WWTP,  
111 while Dumke et al. (2021) targeted E and S genes to quantify SARS-CoV-2 in wastewater.

112 Ciesielski et al. (2021) performed an interlaboratory validation study of 60 samples comparing  
113 RT-qPCR to RT-ddPCR quantification. The aim of this study was to (a) compare the utilization

114 of two different molecular quantification platforms to identify the changing aspects of SARS-

115 CoV-2 viral concentration in the wastewater influent from four WWTP serving Charlotte, North

116 Carolina (NC) for six months, and (b) to correlate wastewater concentration (quantified by both  
117 RT-qPCR and RT-ddPCR) with clinical surveillance data of SARS-CoV-2 infection.

## 118 **2. Methodology**

### 119 **2.1 Sample collection**

120 24-h flow-weighted composite samples of influent wastewater were initially collected every  
121 Wednesday starting on June 24, 2020, from four WWTP (A, B, C, and D) in Charlotte, North  
122 Carolina. Wastewater samples were collected in the morning between 7:00-8:45 am in sterile 1L  
123 Nalgene bottles. Following collection, the wastewater samples were heat pasteurized for 40  
124 minutes at 75°C in accordance with the Institutional Biosafety Committee's mandatory protocol for  
125 the protection of laboratory personnel (WHO, 2020b). Heat pasteurized duplicate samples from  
126 each WWTP were transported to the laboratory in coolers packed with ice. Deionized water in a  
127 1 L Nalgene sample collection bottle was used as a field blank. The field blank was exposed to  
128 the same environment and transported to the laboratory in coolers packed with ice along with the  
129 wastewater samples. The collected samples were processed immediately after reaching the  
130 laboratory. A recent study conducted by Pecson et al. (2021) observed that SARS-CoV-2  
131 quantitation was slightly higher in pasteurized samples after recovery correction. Sample  
132 collection increased to twice a week, on Monday and Wednesday during November and  
133 December 2020. Monday sampling represented the 24 h composite sample beginning on Sunday  
134 through Monday while Wednesday sampling represented the 24 h composite sample beginning  
135 on Tuesday through Wednesday. A total of 115 wastewater samples were collected during 31  
136 sampling events. Data from two sampling events were not included in this reported dataset  
137 because the PBS blank demonstrated cross-contamination of the samples. The characteristics of  
138 each of the WWTP have been provided in Table 1.

139 **Table 1:** Wastewater Treatment Plant (WWTP) characteristics.

| WWTP                               | A                                                                                  | B                                              | C                                                                                           | D                                                 |
|------------------------------------|------------------------------------------------------------------------------------|------------------------------------------------|---------------------------------------------------------------------------------------------|---------------------------------------------------|
| <b>Permitted Flow</b>              | 12 MGD                                                                             | 12 MGD                                         | 20 MGD                                                                                      | 100,000 GPD                                       |
| <b>Average Daily Flow</b>          | 9.6 MGD                                                                            | 5.5 MGD                                        | 14.6 MGD                                                                                    | 46,650 GPD                                        |
| <b>Estimated Population Served</b> | 120,001                                                                            | 68,685                                         | 182,501                                                                                     | Less than 1000                                    |
| <b>Service area</b>                | 3 Permitted Significant Industrial Users, Major Hospital served, University Campus | All residential and commercial, Major Hospital | 14 Permitted Significant Industrial Users, Major Hospitals, Serves part of Uptown Charlotte | Package Plant Services Residential Community Only |

140

141 **2.2 Sample concentration**

142 6300 copies/ $\mu$ L of Bovine Coronavirus (BCoV, ValleyVet Supply, Marysville, KS) were spiked  
 143 into the wastewater sample before concentration as overall process control. Wastewater samples  
 144 were adjusted to a pH of 3.5-4 using 10M HCl, followed by the addition of 2.5 M MgCl<sub>2</sub>.6H<sub>2</sub>O  
 145 to achieve a final concentration of 25 mM MgCl<sub>2</sub>.6H<sub>2</sub>O (Ahmed, Bertsch, et al., 2020;  
 146 Cashdollar and Wymer, 2013). Using a disposable filter funnel fitted with a 47 mm dia. 0.45  $\mu$ m  
 147 type HA Filter (Millipore, Bedford MA), 20 mL of each wastewater sample was concentrated  
 148 using a vacuum filtration manifold and was filtered to dryness. Negative process control or  
 149 Method Blank (MB) consisting of 1X phosphate buffered saline (PBS) was filtered during each  
 150 of the sample processing events using a new sterile filter funnel and type HA electronegative  
 151 filter (Ciesielski et al., 2021). After wastewater concentration, the filter was placed in individual  
 152 2 mL microcentrifuge tubes. The process was repeated 8 times for each wastewater sample. One  
 153 filter was used for Workflow 1, one for Workflow 2, (Fig. 2) and the others were archived at -



154 80°C for future analyses. For workflow 1 the filter was suspended in the AVL buffer for RNA  
155 extraction.

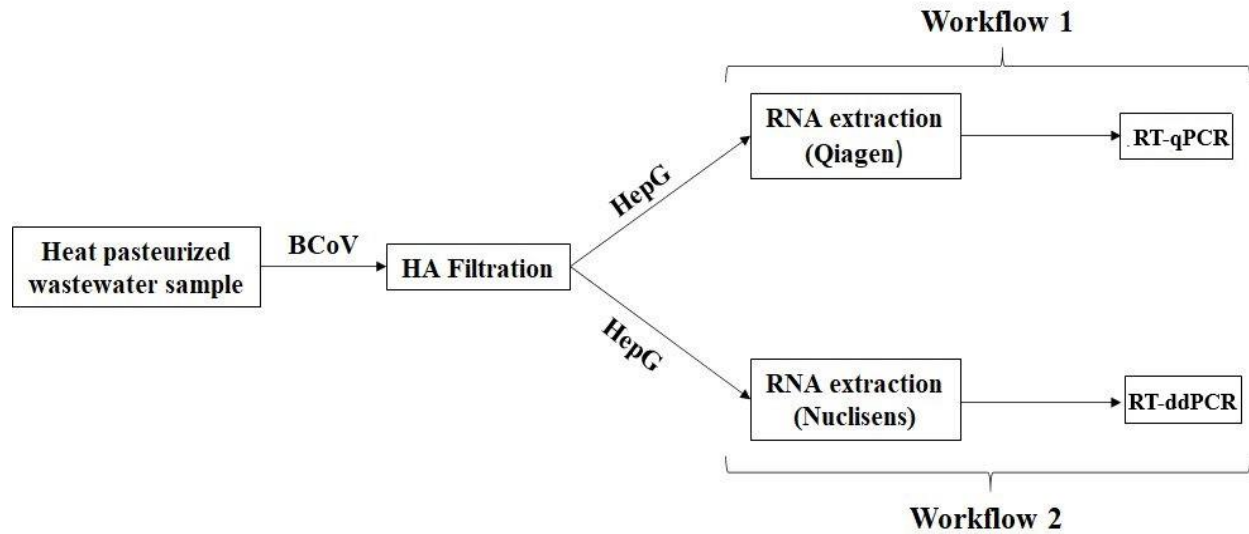

156  
157 **Fig. 2.** Showing the two different workflows performed to quantify SARS-CoV-2 in the influent  
158 wastewater.

### 159 **2.3 Workflow 1**

#### 160 **2.3.1 Viral RNA extraction**

161 The filters with concentrated samples were suspended in 1000 µL of AVL lysis buffer with  
162 carrier RNA and spiked with 15,600 copies of armored Hepatitis G (Hep G) (p/n 42024  
163 Asuragen, Austin, TX). Samples were then vortexed and incubated at room temperature for 10  
164 minutes to facilitate viral recovery from the filter surface (Gibas et al., 2021; Juel et al., 2021).

165 QIAamp® Viral RNA Mini Kit (Qiagen, Germantown, Maryland, USA) was used following the  
166 manufacturer's instructions for viral RNA extraction where the amount of the lysed sample was  
167 200 µL with a final elution volume of 60 µL of viral RNA extract.

#### 168 **2.3.2 Detection and quantification using RT-qPCR**

169 Detection and quantification of SARS-CoV-2 viral RNA in wastewater were performed by one-  
170 step RT-qPCR on a CFX Connect thermocycler (Bio-Rad, Hercules, CA) utilizing the 2019-

171 nCoV CDC RUO Kit (Integrated DNA Technologies) targeting the nucleocapsid genes (N1 and  
172 N2) (Table S1). The reaction mixture comprised a total volume of 20  $\mu$ L containing 5  $\mu$ L  
173 extracted RNA template, 10  $\mu$ L iTaq universal probes reaction mix (Bio-Rad), 0.5  $\mu$ L iScript  
174 reverse transcriptase (Bio-Rad), 1.5  $\mu$ L (500 nM) primers along with a (125 nM) probe and 3  $\mu$ L  
175 of nuclease-free water. The thermocycling conditions employed were 25°C for 2 min, 50°C for  
176 15 min, 95°C for 2 min followed by 45 cycles of amplification including denaturation at 95 °C  
177 for 3 secs and extension at 55 °C for 30 secs (CDC RT-qPCR panel 2020). Synthetic, single-  
178 stranded SARS-CoV-2 RNA (Twist Bioscience, San Francisco, CA) was used as a positive  
179 control. No template control (NTC) in triplicate was included with every run, where the RNA  
180 template was replaced with nuclease-free water, to determine if the mastermix was contaminated  
181 and if there was non-specific amplification during the later amplification cycles. Each sample  
182 was analyzed in triplicate, including the positive control and NTC reactions on each RT-qPCR  
183 run. RT-qPCR runs were analyzed by Bio-Rad CFX Manager software version 3.1 (Bio-Rad  
184 Laboratories).

### 185 ***2.3.3 Quality Control (QC) Parameters***

186 Precise QC metrics were considered to assess the detection sensitivity of CDC recommended N1  
187 and N2 assays for both workflow 1 (RT-qPCR) and workflow 2 (RT-ddPCR). QC was taken into  
188 consideration throughout the whole study to avoid ambiguous interpretation of the obtained  
189 results. The positive and negative controls used during each of the steps for both the workflows  
190 (1 and 2) were in accordance with MIQE (Bustin et al., 2009) and the digital MIQE (dMIQE  
191 Group, 2020) guidelines. The detailed quality control and the criteria for data evaluation  
192 implemented has been provided below;

#### 193 ***2.3.3.1 Process Control***

194 BCoV was spiked into wastewater samples as a proxy for SARS CoV-2, which could be  
195 measured throughout the extraction and RT-qPCR process. 6300 copies of BCoV vaccine was  
196 spiked per mL of wastewater. The initial titer of BCoV vaccine was quantified by RT-ddPCR  
197 prior to spiking. The average BCoV recovery for each of the WWTP was observed to be 21-  
198 31%.

### 199 **2.3.3.2 Extraction control**

200 15,600 copies of armored hepG were spiked into the lysis buffer before the RNA extraction  
201 process to check the quality of the extracted RNA. The initial concentration of the armored hepG  
202 was determined by ddPCR after heat treatment at 75°C for 3 minutes to remove the protein coat  
203 surrounding the HepG RNA sequence. The average HepG recovery for each of the WWTP was  
204 observed to be 38-44%.

### 205 **2.3.3.3 Standard Curve**

206 Single-stranded RNA from Twist Bioscience was extracted in the same manner as wastewater  
207 influent samples. The RNA standard was quantified using RT-ddPCR prior to extraction. 10-  
208 fold serial dilution was performed with the extracted RNA over four orders of magnitude for  
209 generating N1 and N2 standard curves. Detailed information has been provided in the  
210 supplementary file (Fig. S1). The amplification efficiency was 90% for both N1 and N2 assay  
211 with an  $R^2$  value of 0.998 and 0.997, respectively which was within the acceptable range as  
212 specified in MIQE guidelines (Bustin et al., 2009).

### 213 **2.3.3.4 Limit of Detection**

214 To avoid false positives and provide precise quantification, the limit of detection (LoD) for the  
215 assay was determined by running an extended series of dilutions of the RNA based SARS-CoV-2  
216 positive control (Twist Bioscience) in six replicates with as few as 1 copy/reaction (three-fold

217 dilution series towards the lower end). The threshold cycle at which signals were observed for all  
218 the three replicates with a standard deviation less than 1 was considered to be the Cq of LoD  
219 ( $Cq_{LoD}$ ). Cq values of 37.07 and 37.78 for N1 and N2 assays, respectively were converted to  
220 copies per reaction using the equation (1) to get the LoD for the assay.

$$221 \quad X_{O} = E_{AMP}^{(b-Cq)} \dots\dots\dots (1)$$

222 Where,  $E_{AMP}$  represents exponential amplification value of RT-qPCR assay, evaluated as  $E_{AMP} =$   
223  $10^{-1/m}$ ,  $b$  represents the intercept and  $m$  represents the slope. The LoD for workflow 1 was  
224 determined as 3000 copies/L of wastewater for both targets.

### 225 **2.3.3.5 Inhibition**

226 The dilution method was used for the determination of the RT-qPCR inhibition (Graham et al.,  
227 2021). A dilution series of 1:1, 1:2, 1:5 and 1:10 was performed on a subset of samples (n=10)  
228 for assessing inhibition. If the diluted sample showed a more than 1 Cq difference between the  
229 actual and theoretically expected change in Cq, then the undiluted samples were considered  
230 inhibited. There was no inhibition observed for the N1 target but there was with N2. A dilution  
231 1:2 was selected to continue inhibition testing as further dilution resulted in Cq values beyond  
232 LoD or as non-detectable and the quantification data was updated accordingly.

### 233 **2.3.3.6 Other Criteria for QC and data evaluation:**

- 234 ● RNA extraction and master mix preparation for molecular quantification was conducted  
235 in two different biosafety cabinets in two separate laboratories next to each other to  
236 reduce contamination potential.
- 237 ● RNA samples showing very poor overall recovery (below 2%) compared to the average  
238 recovery (23%) were re-extracted and re-quantified.

- 239       • Samples were considered positive when a minimum of two out of three replicates showed  
240            amplification above LoD for N1 and N2 assay.

## 241   **2.4 Workflow 2**

### 242   **2.4.1 Viral RNA extraction**

243   Frozen filters containing the concentrated sample were shipped on dry ice and stored at -80°C  
244   until analysis. The filter containing the concentrated sample was placed in 1mL of Nuclisens®  
245   easyMAG® Lysis Buffer (Biomerieux, Durham, NC) containing approximately 900 copies of  
246   armored HepG and incubated for a minimum of 10 minutes at room temperature. Lysis tubes  
247   were centrifuged for 1 minute at 13,000 x g and up to 950 µL of lysate transferred to a 96 well  
248   deep well plate (DWP). All samples, including controls, were extracted using NucliSens®  
249   EasyMAG reagents (Biomerieux, Durham, NC) on a KingFisher Flex (ThermoFisher, Waltham,  
250   MA) with a final elution volume of 100µL. KingFisher script is provided in the supplementary  
251   material (Table S7a).

### 252   **2.4.2 Detection and quantification using RT-ddPCR**

253   RT-ddPCR was utilized to quantify SARS-CoV-2 RNA copies targeting N1 and N2, described  
254   previously (Table S1), and utilizing a two-step reverse transcription and RT-ddPCR. Purified  
255   RNA was reverse transcribed using Superscript VILO IV MM (ThermoFisher Waltham, MA.).  
256   Briefly, 50µL of the eluate was combined with 20µL 5X VILO IV MM, 1µL (160 copies) mouse  
257   lung RNA (p/n R1334152-50 BioChain Newark, CA) and 29µL of DEPC water for a total  
258   reaction volume of 100 µL (Table S7a). Reverse transcription was performed on a C1000 deep  
259   block thermal cycler (BioRad) with the following conditions: 25°C for 10 minutes, 50°C for 10  
260   mins, and 85°C for 5 minutes. 5 µL of cDNA was used for each RT-ddPCR reaction. A  
261   mastermix was created by the addition of forward and reverse primers (0.9µM final

262 concentration) and for probes (0.25 $\mu$ M final concentration), 12.5 $\mu$ L of 2X Supermix for Probes  
263 (no dUTP, Bio-Rad), 5 $\mu$ L template, and nuclease-free water for a final volume of 25 $\mu$ L. A  
264 minimum of 4 no template controls (NTC), which substituted 5 $\mu$ L nuclease-free water for the  
265 template, were included in each run with every assay plate. Primers and probes were synthesized  
266 by LGC Biosearch Technologies (Novato, CA) except for Mouse ACTB exogenous control (Life  
267 Technologies ThermoFisher Scientific Waltham, MA). The concentration used in the assays is  
268 listed in S7b. Primers and probe sequences for the *gyrA* for inhibition control were kindly  
269 provided by John Griffith (SCCWRP) and have not been published. The inhibition probe was  
270 labeled with the HEX fluorophore and the RT-ddPCR assay was run as a duplex with all  
271 reactions performed in duplicate. Positive and negative controls were run on every assay plate.  
272 All assay conditions were previously optimized and established by the Noble Laboratory.  
273 Droplet generation was performed in accordance with manufacturer's instructions, and then  
274 droplets were amplified in a C1000 thermal cycler with the following temperature profile: 10  
275 min at 95°C for initial denaturation, 40 cycles of 94°C for 30 s, and 55°C for 60 s, followed by  
276 98°C for 10 min, with a ramp rate of 2°C per sec, then an indefinite hold at 12°C. After RT-  
277 ddPCR cycling was complete, the plate was placed in a QX200 instrument (Bio-Rad) and  
278 droplets were analyzed according to the manufacturer's instructions. Data acquisition and  
279 analysis were performed with QuantaSoft V1.74.0917 (Bio-Rad). The fluorescence amplitude  
280 threshold, distinguishing positive from negative droplets, was set manually by the analyst as the  
281 midpoint between the average baseline fluorescence amplitude of the positive and negative  
282 droplet cluster. The same threshold was applied to all the wells of one RT-ddPCR plate.  
283 Measurement results of single RT-ddPCR wells were excluded on the basis of technical reasons  
284 in case that (i) the total number of accepted droplets was <10,000, or (ii) the average

285 fluorescence amplitudes of positive or negative droplets were clearly different from those of the  
286 other wells on the plate. The numbers of positive and accepted droplets and concentration per  
287  $\mu\text{L}$  were transferred to an in-house developed spreadsheet to calculate the copy number per  
288 filtered volume. Replicate wells were merged, and a sample was considered positive only if  
289 there were three or more positive droplets and each well contained a minimum of 10,000  
290 droplets.

#### 291 ***2.4.3 Process Control***

292 BCoV was spiked into wastewater samples as a proxy for SARS CoV-2, which could be  
293 measured throughout the extraction and RT-qPCR process. The copy number of BCoV was  
294 quantified by RT-ddPCR prior to spiking. The filter was extracted utilizing the same viral RNA  
295 extraction kit as the influent wastewater samples. About 38-44% average BCoV recovery was  
296 observed for each of the WWTP.

#### 297 ***2.4.4 Extraction control***

298 Approximately 900 copies of armored HepG were spiked into the Lysis Buffer before the RNA  
299 extraction process to monitor the quality of the extracted RNA. Negative extraction controls  
300 (NECs) were included to verify the absence of cross-contamination and consisted of a blank HA  
301 filter processed under the same conditions as the other samples. The initial concentration of the  
302 armored HepG was determined by RT-ddPCR after heat treatment at  $75^{\circ}\text{C}$  for 3 minutes to  
303 remove the protein coat surrounding the HepG RNA sequence. The average HepG recovery for  
304 all the WWTP was found to be 17.3 - 29.8%.

#### 305 ***2.4.5 Inhibition control***

306 PCR inhibition was measured by the addition of a halophilic archaeon containing 160 copies of  
307 the *gyrA* gene into the mastermix. The halophiles had been cultured, aliquots frozen at  $-20^{\circ}\text{C}$ ,

308 and the concentration determined independently prior to the sample analysis. Inhibition was  
309 measured by the addition of exogenous cells and a sample was deemed inhibited if the difference  
310 of the expected versus the actual concentration differed by greater than 0.5 log (Table S6).

#### 311 ***2.4.6 Reverse transcription (RT) efficiency control***

312 162 copies of mouse lung total RNA were spiked into the reverse transcription master mix and  
313 the recovery was measured using a mouse ACTB assay (Life Technologies). Recovery was  
314 measured by dividing the concentration of the unknown sample by the negative extraction  
315 control and multiplying by 100 (Table S7b).

#### 316 ***2.4.7 N1 and N2 Standard***

317 Armored RNA Quant SARS-CoV-2 control, which encapsulates the in vitro transcribed RNA  
318 template in a protective protein coat and targets the SARS-CoV-2 viral nucleocapsid (N) region,  
319 was used as a positive control and run in duplicate for every set of reactions targeting N1 and  
320 N2.

#### 321 ***2.4.8 Limit of Detection, Limit of Quantification, and Limit of Blank***

322 For the determination of LoD using RT-ddPCR, the Limit of Blank (LoB) was elucidated from  
323 eight replicates of negative matrix samples derived from influent collected at multiple WWTP  
324 throughout eastern NC. The LOB was calculated as the mean concentration of all sixty-four  
325 replicates and the LOD was then calculated as two standard deviations beyond the defined LOB  
326 (Hayden et al., 2013). The LOQ was determined to be never less than 3 positive droplets no  
327 matter the number of merged wells, which for this study was two, resulting in 10  $\mu$ L or 10% of  
328 the RNA eluate and is equal to a concentration of 10 copies. The detailed LOB, LOD, and LOQ  
329 for N1 and N2 gene targets for RT-ddPCR has been provided in Table 2.

330 **Table 2:** LOB, LOD, and LOQ for N1 and N2 gene targets for RT-ddPCR.



|                                 | N1       | N2      |
|---------------------------------|----------|---------|
| <b>LOB (copies/L)</b>           | 52.312   | 15.619  |
| <b>estimated LOD (copies/L)</b> | 1101.303 | 330.011 |
| <b>LOQ (copies/L)</b>           | 1101.33  | 1000    |

331

## 332 **2.5 Recovery efficiency of BCoV and HepG**

333 The following formula was utilized for both workflow 1 and 2 to determine the recovery  
334 efficiency of BCoV and HepG;

$$335 \quad \text{Recovery efficiency}(\%) = \left( \frac{\text{Total copies recovered}}{\text{Total copies spiked}} \right) \times (100)$$

336 The average BCoV and HepG recovery efficiency for workflows 1 and 2 are provided in  
337 Supplementary Tables S2 and S3.

## 338 **2.6 Epidemiological data**

339 The North Carolina Department of Health and Human Services (NC DHHS) published the  
340 cumulative confirmed COVID-19 cases by 5-digit zip code as an online map  
341 (<https://nc.maps.arcgis.com/home/item.html?id=52f127a0767149ec984e91fcc06b06cb#overview>  
342 ). The map was typically updated daily, overwriting the previous day's count. We obtained a  
343 daily time series of cumulative cases from the WRAL online repository  
344 ([https://github.com/wraldata/nc-covid-data/tree/master/zip\\_level\\_data/time\\_series\\_data/csv](https://github.com/wraldata/nc-covid-data/tree/master/zip_level_data/time_series_data/csv)),  
345 which extracted and archived the NC DHHS published case reports each day. Missing counts in  
346 the WRAL archive were filled with the cumulative cases reported for the same date that we had  
347 manually archived from the NC DHHS COVID-19 dashboard for a subset of dates  
348 (<https://covid19.ncdhhs.gov/dashboard/data-behind-dashboards>). We calculated daily incident  
349 cases as the difference between the current and previous day's reported cumulative cases,  
350 carrying the last non-missing value forward as necessary.

351 Zip code and sewershed boundaries do not typically align (Fig.3). Daily case counts for each  
352 sewershed were represented by the sum of all cases in each zip code that substantially  
353 overlapped the sewershed boundary, defined as >50% of the zip code area within the sewershed  
354 or >50% of the sewershed area within the zip code. We used the 2019 American Community  
355 Survey (ACS) 5-year block group population estimates to estimate the population served by each  
356 sewershed.

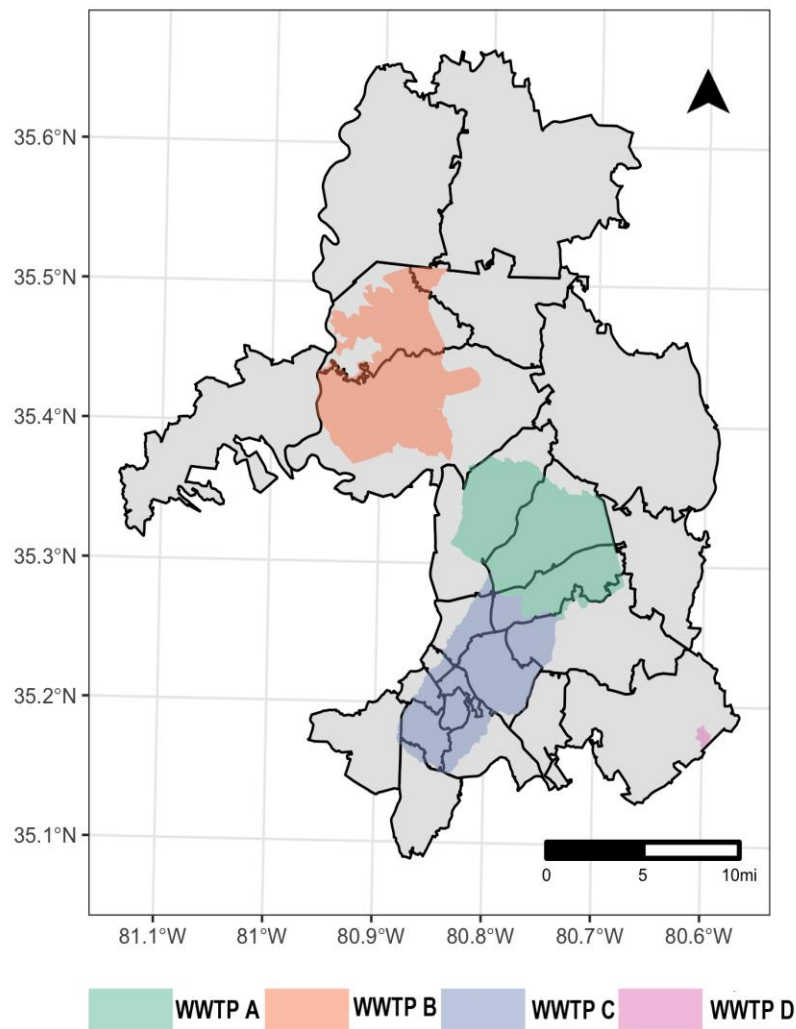

357  
358 **Fig.3.** Map showing the four sewershed location and the overlapping zip codes of Charlotte, NC.

359 **2.7 Statistical analysis**

360 Percent agreement statistics and Cohen's Kappa coefficient was used to determine the agreement  
361 of SARS-CoV-2 positivity and negativity results between the RT-qPCR and RT-ddPCR  
362 (McHugh, 2012; Obermeier et al., 2016). The strength of the agreement is interpreted based on  
363 the Kappa value (k): there is no agreement if  $k \leq 0$ , slight agreement if  $k = 0.01-0.20$ , fair if  $k =$   
364  $0.21-0.40$ , moderate if  $k = 0.41-0.60$ , substantial if  $k = 0.61-0.80$ , and nearly a perfect agreement  
365 if  $k = 0.81-1.00$  (McHugh, 2012). Spearman's rank correlation test was performed to determine  
366 the correlation of the SARS-CoV-2 concentration in influent wastewater with the averaged  
367 clinical (7-day moving average) COVID-19 cases. The correlation between the viral RNA signal  
368 and incident clinical cases, offset for 1 to 14 days (taking the wastewater influent collection date  
369 as the reference), was also computed for determining whether the influent wastewater SARS-  
370 CoV-2 RNA signal may serve as a leading indicator of the reported clinical cases. Case offset  
371 times exhibiting higher correlation with a p-value less than 0.05 were considered to be the  
372 probable lag time window.

### 373 **3. Results and discussion**

#### 374 **3.1 RT-qPCR vs RT-ddPCR platform**

375 In this study, the utility of two different molecular platforms (RT-qPCR and RT-ddPCR)  
376 were compared to check SARS-CoV-2 detection frequency and concentration in the municipal  
377 influent wastewater.

##### 378 **3.1.1 Detection frequency and trends**

379 The detection frequency and trend of SARS-CoV-2 RNA in the municipal influent  
380 wastewater of Charlotte was observed by both RT-qPCR and RT-ddPCR using N1 and N2  
381 targets. From the very first sampling event SARS-CoV-2 RNA was detected in the municipal  
382 wastewater influent samples of all the four WWTP throughout the six-month course (Fig. 4a).

383 RT-qPCR detected a higher percentage of SARS-CoV-2 positives using the N1 target compared  
384 to N2 target (Table 3). About 27.83% of samples detected positive with the N1 target did not  
385 show any signal with the N2 target. In addition, the N2 assay showed inhibition while N1 did not  
386 (Table S4 and S5). On the other hand, RT-ddPCR performed well in detecting SARS-CoV-2  
387 using both N1 and N2 targets, though the N2 target was quantified in a higher percentage (36-  
388 48%) of samples (Table 3). When comparing the molecular platform, RT-ddPCR showed more  
389 sensitivity than RT-qPCR in quantifying SARS-CoV-2 RNA in wastewater samples. However,  
390 SARS-CoV-2 RNA was quantified more readily using the N1 target across all samples using  
391 both platforms. As such, downstream analysis was conducted only using N1 data. SARS-CoV-2  
392 positivity agreement between the two molecular platforms was 74.4% while the negative  
393 agreement was 52.6%. The overall percent agreement was 71% with the Cohen's Kappa  
394 coefficient (k) of 0.21. Ciesielski et al. (2021) also found a similar agreement with a k value of  
395 0.31 when comparing detection performance between RT-qPCR and RT-ddPCR. Other  
396 researchers compared RT-ddPCR and RT-qPCR and observed the former one to be more  
397 sensitive in the detection of low viral titer but they have mainly focused on N1 target only  
398 (Gonzalez et al., 2021).

399 **Table 3:** Detection frequency of N1 and N2 gene

| WWTP | RT-qPCR |        | RT-ddPCR |        |
|------|---------|--------|----------|--------|
|      | N1 (%)  | N2 (%) | N1 (%)   | N2 (%) |
| A    | 82.14   | 50     | 77.8     | 96.3   |
| B    | 82.75   | 48.3   | 67.9     | 78.6   |
| C    | 93.1    | 51.72  | 82.76    | 86.2   |
| D    | 55      | 10     | 73.68    | 57.9   |

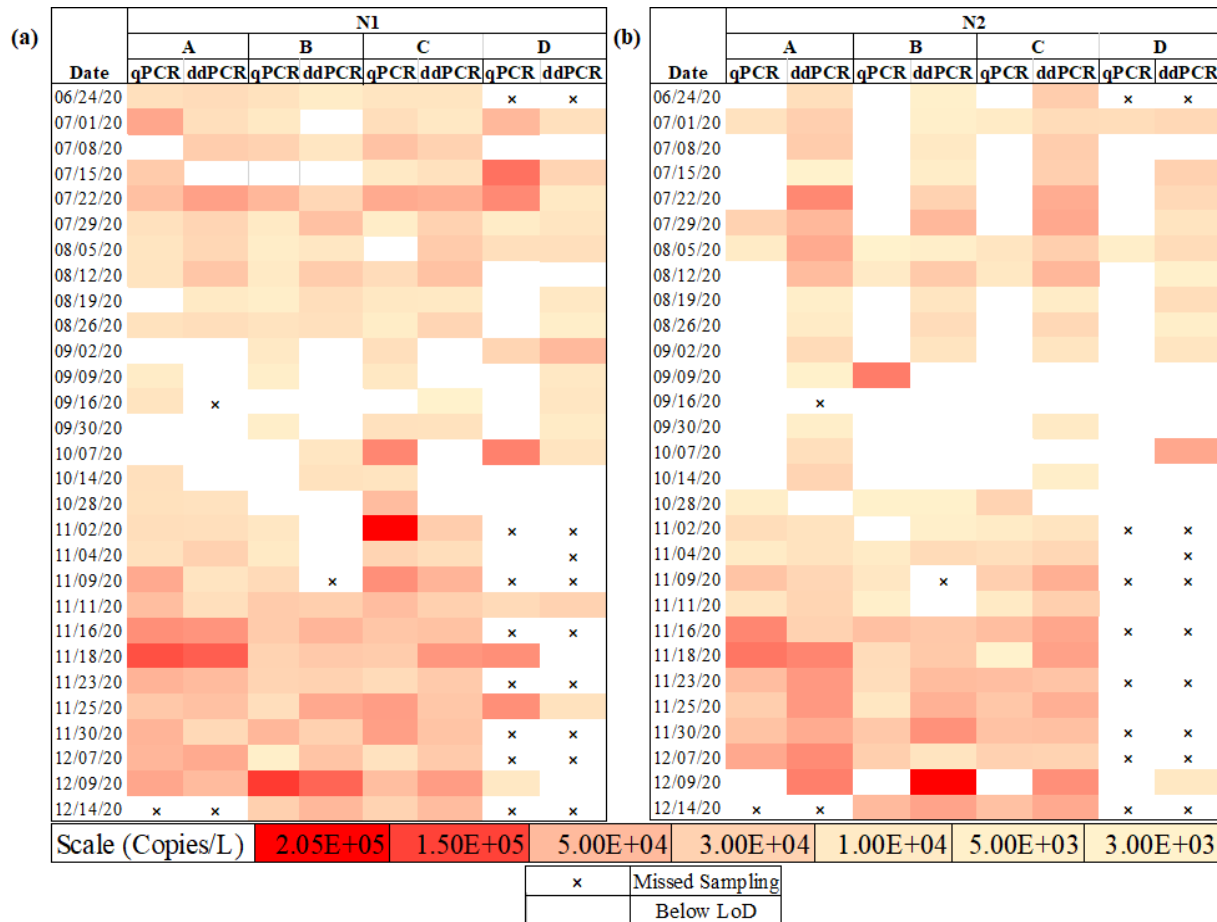

401

402 **Fig.4.** Heat map of concentrations of (a) N1 and (b) N2 targets to evaluate SARS-CoV-2  
 403 prevalence at WWTP A, B, C and D using RT-qPCR and RT-ddPCR. The symbol “x” indicates  
 404 a missed sampling event and the uncolored blank spaces indicate a sample that was below the  
 405 limit of detection (LoD).

406

### 407 3.1.2 Quantitative relationship

408 The overall quantitative data generated using both RT-qPCR and RT-ddPCR for the WWTP A,  
 409 B, C was positively correlated ( $\rho=0.569$ ,  $p<0.0001$ ) with statistical significance. The agreement  
 410 between the platforms is shown using a range of colors corresponding to concentrations between  
 411 3.00E+03 copies/L and 2.05E+05 (Fig.4). RT-qPCR and RT-ddPCR generated similar SARS-  
 412 CoV-2 RNA concentration data across the duration of the study which is indicated by the  
 413 consistency between colors for both platforms on any given collection date. However, the

414 quantitative data of WWTP D was highly variable and not significantly correlated ( $\rho=-0.047$ ,  
415  $p=0.91$ ) which could be attributed to the fact that WWTP D is smaller in size and serves a  
416 smaller population compared to the other WWTP of Charlotte, NC. For most of the samples in  
417 this study, SARS-CoV-2 viral concentrations were in the range of  $10^3$ - $10^5$  copies/L for both RT-  
418 ddPCR and RT-qPCR. These SARS-CoV-2 concentrations are consistent with previous studies  
419 conducted by Sherchan et al. (2020) and Gonzalez et al. (2020) in wastewater throughout  
420 Louisiana and Southeastern Virginia, respectively. The highest peak value of SARS-CoV-2  
421 concentration in the influent wastewater for the WWTP A, B and C was observed to be around  
422  $1.15 \times 10^5$ - $1.96 \times 10^5$  copies/L by both RT-qPCR and RT-ddPCR. Also, the concentration of the  
423 88% quantified samples were within 0.5 log variation resulting in a percentage difference within  
424 12.5%. Miyani et al. (2020) also reported the highest SARS-CoV-2 concentration in the influent  
425 wastewater of Michigan to be within the range of  $2 \times 10^5$  copies/L. It is interesting to note that the  
426 highest viral quantification for both RT-ddPCR and RT-qPCR was observed by the end of  
427 November for WWTP A, B and C. Similar shades of colors (Fig. 4) were witnessed by the end of  
428 November indicating that the quantification by both RT-ddPCR and RT-qPCR were in  
429 agreement.

### 430 **3.2 COVID-19 clinical cases and SARS-CoV- 2 concentration in wastewater influent**

431 The concentration of SARS-CoV-2 in the municipal influent wastewater was correlated with the  
432 clinically reported COVID-19 case numbers for Mecklenburg County, Charlotte, NC. The  
433 SARS-CoV-2 concentration quantified by both RT-qPCR and RT-ddPCR in the influent  
434 municipal wastewater of Charlotte for all the WWTP were plotted against the clinically reported  
435 7-day average COVID-19 cases for zip codes served by each plant (Fig.5). From Fig. 5a, 5b and  
436 5c it is evident that the trends of reported COVID-19 cases match with the influent wastewater

437 concentration quantified by both RT-qPCR and RT-ddPCR. The influent wastewater  
438 concentration and the reported COVID-19 cases trends was a perfect match for WWTP A  
439 followed by WWTP C and B. For each WWTP, there was an increase during the summer months  
440 followed by a drop in both reported COVID-19 cases as well as influent wastewater  
441 concentration and then again, an increase was witnessed during the winter. In Charlotte, NC zip  
442 codes served by plants A and C mostly contributed to the increase in COVID-19 cases followed  
443 by WWTP B. Spearman rank correlation determined that there was a significant, moderate to  
444 strong, and positive correlation observed between SARS-CoV-2 RNA in influent wastewater and  
445 7-day average COVID-19 cases throughout the entirety of the six-month period. This correlation  
446 became more robust when clinically reported COVID-19 cases were lagged in against the  
447 influent wastewater SARS-CoV-2 data. With RT-qPCR, the influent wastewater SARS-CoV-2  
448 viral RNA data was likely to lead by 11 days ( $\rho=0.92$ ,  $p<0.001$ ), 10 days ( $\rho=0.81$ ,  $p<0.001$ ) and  
449 5 days ( $\rho=0.61$ ,  $p<0.001$ ) for WWTP A, B, and C, respectively while using RT-ddPCR, the lead  
450 time was 12 days ( $\rho=0.67$ ,  $p=0.001$ ), 7 days ( $\rho=0.72$ ,  $p<0.001$ ) and 10 days ( $\rho=0.50$ ,  $p<0.02$ )  
451 respectively. The lead time may vary depending on the sewershed pattern, the geospatial pattern  
452 of the population served for a WWTP, available testing facility and difference in the clinical  
453 sample collection date and result published to date (Bibby et al., 2021; Olesen et al., 2021). Even  
454 if the influent wastewater concentration data provided a predictive lead to the reported COVID-  
455 19 cases, it is interesting to note that the trend of the raw SARS-CoV-2 concentration data  
456 generated from the influent wastewater is similar to the reported COVID-19 cases. Additionally,  
457 SARS-CoV-2 concentration upsurge as quantified by both RT-qPCR and RT-ddPCR at a certain  
458 WWTP and decrease in another WWTP suggested that WBE provided us with the specific  
459 location where individuals are most or least infected than just the copies/L. Hasan et al. (2021)

460 has also reported a similar observation where they have suggested the significant potential of  
461 WBE in monitoring upsurge or decline in COVID-19 positive case counts for a specific  
462 geographical location.

463 (a)

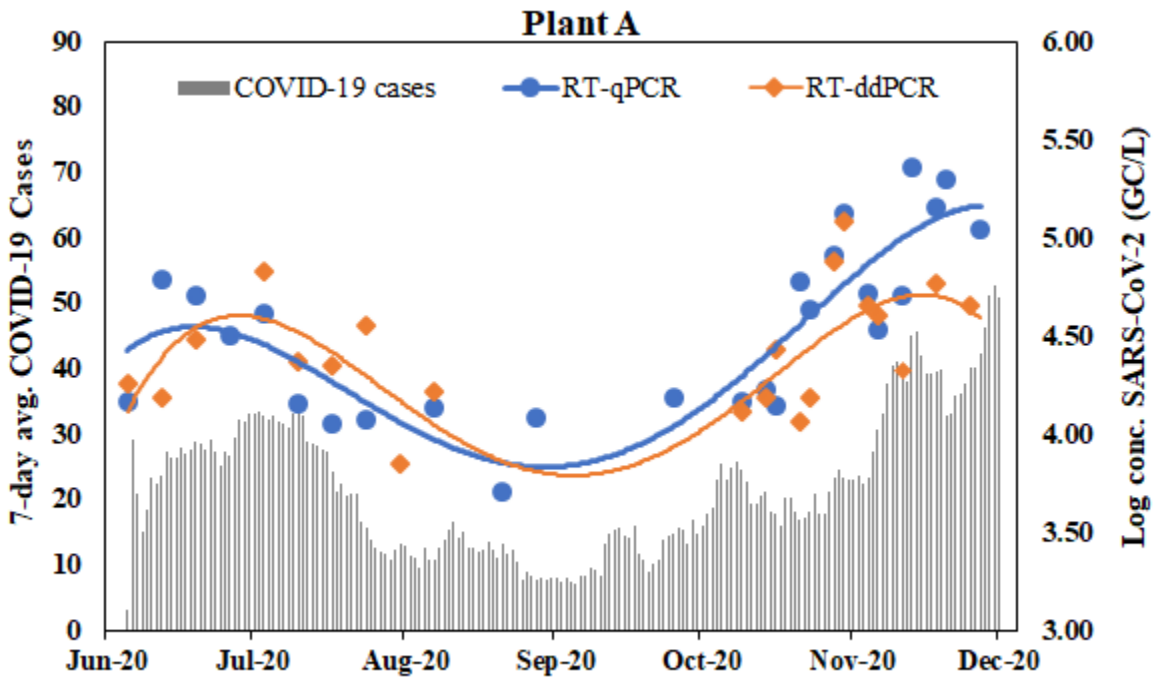

464



465 (b)

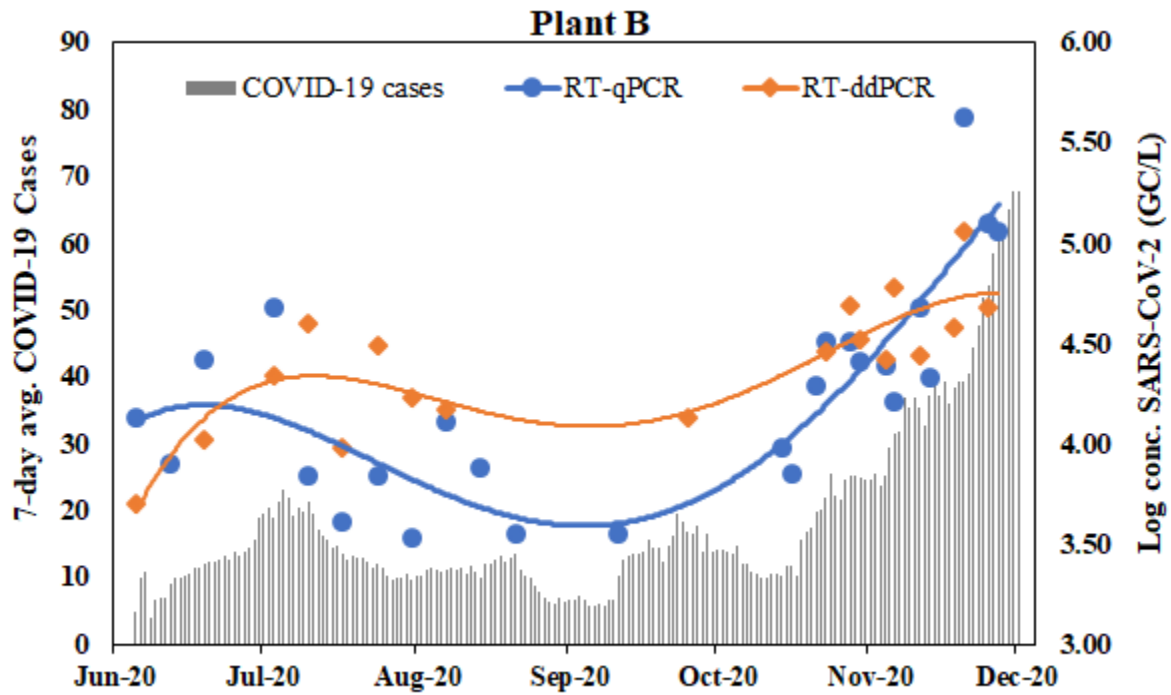

466  
467  
468

(c)

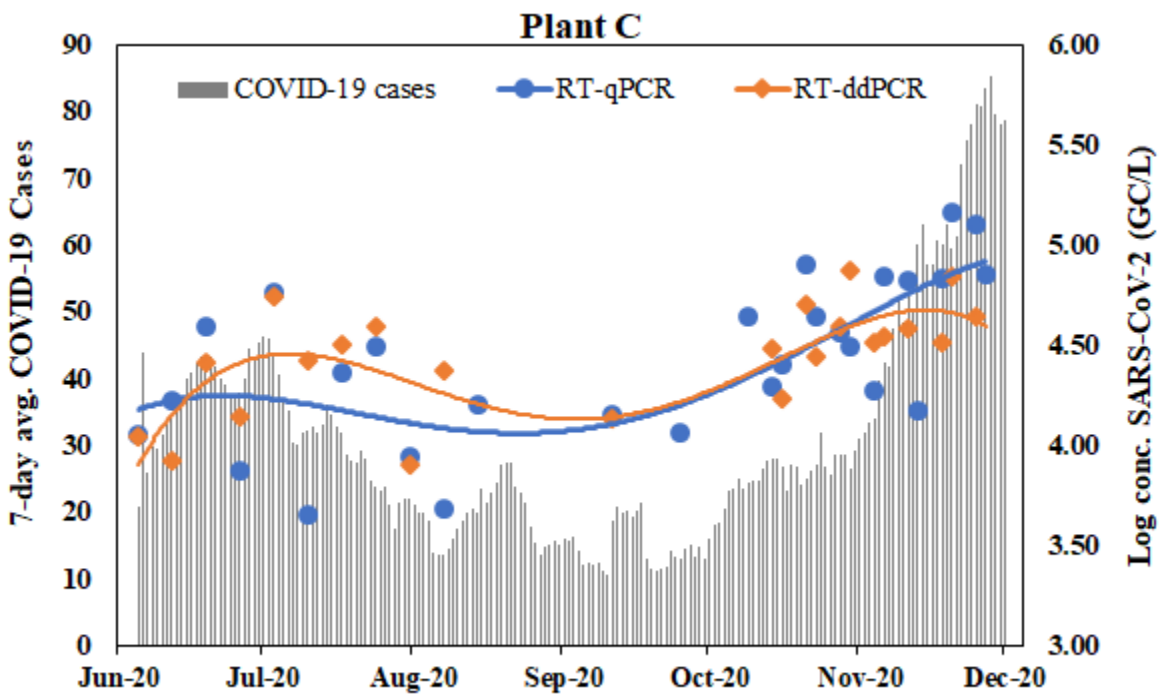

469

470 **Fig.5.** SARS-CoV-2 concentration (N1 target) for workflow 1 and 2 quantified by RT-qPCR and  
471 RT-ddPCR in the influent wastewater of (a) WWTP A, (b) WWTP B, and (c) WWTP C plotted  
472 against the 7-day average cases of each zipcode served by each WWTP. Quadratic polynomial  
473 trendline was used for the best fitted curve.

474

#### 475 **4. Conclusion**

476 This long-term monitoring study of WWTP in the Charlotte Metropolitan area has demonstrated  
477 that wastewater-based monitoring for the N1 target can be successfully carried out using either  
478 RT-qPCR or RT-ddPCR. Different molecular platforms didn't affect overall SARS-CoV-2  
479 quantification in the influent wastewater and showed a good agreement with a variation of less  
480 than 12.5% for most of the samples. Depending on the WWTP, the Spearman rank correlation  
481 showed a moderate to a strong positive correlation between the influent wastewater SARS-CoV-  
482 2 viral signal and 7-day averaged reported COVID-19 cases. Importantly, influent wastewater  
483 SARS-CoV-2 RNA signal strength was leading the reported clinical COVID-19 cases by 5 to 12  
484 days based on the WWTP, which is advantageous to monitor the COVID-19 outbreak in the  
485 community. Irrespective of the molecular platform used for the detection and quantification of  
486 SARS-CoV-2 in influent wastewater, it is important to incorporate all the QA/QC measures  
487 including implementation of appropriate external controls to obtain accurate and comparable  
488 results.

#### 489 **Acknowledgment**

490 This work was supported by North Carolina Policy Collaboratory. The authors acknowledge the  
491 support from the NC WW PATH team for early discussion and protocol sharing that was  
492 leveraged in this study. The authors would like to thank the Charlotte Water team including the  
493 wastewater treatment plant managers and operators for their support on wastewater sampling.

494 The authors are grateful to Stacie Reckling (NC DHHS) and Steven Berkowitz (NC DHHS) for  
495 help with sewershed boundaries and other site related logistics. The authors are also grateful to  
496 Vivek Francis Pulikkal for supporting sample collection and preparation of the NC map using  
497 ArcGIS Pro software and Sol Park for helping with initial sample collection.

## 498 **References**

499 Agrawal, S., Orschler, L., & Lackner, S. (2021). Long-term monitoring of SARS-CoV-2 RNA in  
500 wastewater of the Frankfurt metropolitan area in Southern Germany. *Scientific Reports*, *11*(1),  
501 5372. <https://doi.org/10.1038/s41598-021-84914-2>

502 Ahmed, W., Angel, N., Edson, J., Bibby, K., Bivins, A., O'Brien, J. W., Choi, P. M., Kitajima,  
503 M., Simpson, S. L., Li, J., Tscharke, B., Verhagen, R., Smith, W. J. M., Zaugg, J., Dierens, L.,  
504 Hugenholtz, P., Thomas, K. V., & Mueller, J. F. (2020). First confirmed detection of SARS-  
505 CoV-2 in untreated wastewater in Australia: A proof of concept for the wastewater surveillance  
506 of COVID-19 in the community. *Science of the Total Environment*, *728*, 138764.  
507 <https://doi.org/10.1016/j.scitotenv.2020.138764>

508 Ahmed, W., Bertsch, P. M., Bibby, K., Haramoto, E., Hewitt, J., Huygens, F., Gyawali, P.,  
509 Korajkic, A., Riddell, S., Sherchan, S. P., Simpson, S. L., Sirikanchana, K., Symonds, E. M.,  
510 Verhagen, R., Vasan, S. S., Kitajima, M., & Bivins, A. (2020). Decay of SARS-CoV-2 and  
511 surrogate murine hepatitis virus RNA in untreated wastewater to inform application in  
512 wastewater-based epidemiology. *Environmental Research*, *191*(August), 110092.  
513 <https://doi.org/10.1016/j.envres.2020.110092>

514 Ahmed, W., Tscharke, B., Bertsch, P. M., Bibby, K., Bivins, A., Choi, P., Clarke, L., Dwyer, J.,  
515 Edson, J., Nguyen, T. M. H., O'Brien, J. W., Simpson, S. L., Sherman, P., Thomas, K. V.,  
516 Verhagen, R., Zaugg, J., & Mueller, J. F. (2021). SARS-CoV-2 RNA monitoring in wastewater

517 as a potential early warning system for COVID-19 transmission in the community: A temporal  
518 case study. *Science of the Total Environment*, 761, 144216.  
519 <https://doi.org/10.1016/j.scitotenv.2020.144216>

520 Albastaki, A., Najj, M., Lootah, R., Almeheiri, R., Almulla, H., Almarri, I., Alreyami, A., Aden,  
521 A., & Alghafri, R. (2021). First confirmed detection of SARS-COV-2 in untreated municipal and  
522 aircraft wastewater in Dubai, UAE: The use of wastewater based epidemiology as an early  
523 warning tool to monitor the prevalence of COVID-19. *Science of the Total Environment*, 760,  
524 143350. <https://doi.org/10.1016/j.scitotenv.2020.143350>

525 Aoust, P. M. D., Graber, T. E., Mercier, E., Montpetit, D., Alexandrov, I., Tariq, A., Mayne, J.,  
526 Zhang, X., Alain, T., Servos, M. R., Srikanthan, N., Mackenzie, M., Figeys, D., Manuel, D.,  
527 Jüni, P., Mackenzie, A. E., & Delatolla, R. (2021). *Science of the Total Environment Catching a*  
528 *resurgence : Increase in SARS-CoV-2 viral RNA identified in wastewater 48 h before COVID-*  
529 *19 clinical tests and 96 h before hospitalizations.* 770.  
530 <https://doi.org/10.1016/j.scitotenv.2021.145319>

531 Aoust, P. M. D., Mercier, E., Montpetit, D., Jia, J., Alexandrov, I., Neault, N., Tariq, A., Mayne,  
532 J., Zhang, X., Alain, T., Langlois, M., Servos, M. R., Mackenzie, M., Figeys, D., Mackenzie, A.  
533 E., Graber, T. E., & Delatolla, R. (2021). Quantitative analysis of SARS-CoV-2 RNA from  
534 wastewater solids in communities with low COVID-19 incidence and prevalence. *Water*  
535 *Research*, 188, 116560. <https://doi.org/10.1016/j.watres.2020.116560>

536 Bertrand, I., Challant, J., Mathieu, L., & Gantzer, C. (2021). *International Journal of Hygiene*  
537 *and Environmental Health Epidemiological surveillance of SARS-CoV-2 by genome*  
538 *quantification in wastewater applied to a city in the northeast of France : Comparison of*

539 *ultrafiltration- and protein precipitation-based metho.* 233(January).  
540 <https://doi.org/10.1016/j.ijheh.2021.113692>  
541 Bibby, K., Bivins, A., Wu, Z., & North, D. (2021). Making waves: Plausible lead time for  
542 wastewater based epidemiology as an early warning system for COVID-19. *Water Research*,  
543 202(July), 117438. <https://doi.org/10.1016/j.watres.2021.117438>  
544 Bivins, A., Greaves, J., Fischer, R., Yinda, K. C., Ahmed, W., Kitajima, M., Munster, V. J., &  
545 Bibby, K. (2020). *Persistence of SARS-CoV - 2 in Water and Wastewater*.  
546 <https://doi.org/10.1021/acs.estlett.0c00730>  
547 Bustin, S. A., Benes, V., Garson, J. A., Hellemans, J., Huggett, J., Kubista, M., Mueller, R.,  
548 Nolan, T., Pfaffl, M. W., & Shipley, G. L. (2009). *The MIQE Guidelines : M inimum I*  
549 *nformation for Publication of Q uantitative Real-Time PCR E xperiments SUMMARY : 622,*  
550 611–622. <https://doi.org/10.1373/clinchem.2008.112797>  
551 Cashdollar, J. L., & Wymer, L. (2013). *Methods for primary concentration of viruses from water*  
552 *samples : a review and meta-analysis of recent studies.* 1–11. <https://doi.org/10.1111/jam.12143>  
553 CDC. (2020). *03/10/2020: Lab Advisory: Updated Guidance on Testing Persons for*  
554 *Coronavirus Disease 2019 (COVID-19)*.  
555 [https://www.cdc.gov/csels/dls/locs/2020/updated\\_guidance\\_on\\_testing\\_persons\\_for\\_covid-](https://www.cdc.gov/csels/dls/locs/2020/updated_guidance_on_testing_persons_for_covid-19.html)  
556 [19.html](https://www.cdc.gov/csels/dls/locs/2020/updated_guidance_on_testing_persons_for_covid-19.html)  
557 Chik, A. H. S., Glier, M. B., Servos, M., Mangat, C. S., Pang, X. L., Qiu, Y., D'Aoust, P. M.,  
558 Burnet, J. B., Delatolla, R., Dorner, S., Geng, Q., Giesy, J. P., McKay, R. M., Mulvey, M. R.,  
559 Prystajecy, N., Srikanthan, N., Xie, Y., Conant, B., & Hruddy, S. E. (2021). Comparison of  
560 approaches to quantify SARS-CoV-2 in wastewater using RT-qPCR: Results and implications

561 from a collaborative inter-laboratory study in Canada. *Journal of Environmental Sciences*  
562 (*China*), 107, 218–229. <https://doi.org/10.1016/j.jes.2021.01.029>

563 Ciesielski, M., Blackwood, D., Clerkin, T., Gonzalez, R., Thompson, H., Larson, A., & Noble,  
564 R. (2021). Assessing sensitivity and reproducibility of RT-ddPCR and RT-qPCR for the  
565 quantification of SARS-CoV-2 in wastewater. *Journal of Virological Methods*, July, 114230.  
566 <https://doi.org/10.1016/j.jviromet.2021.114230>

567 Dumke, R., De, M., Barron, C., Oertel, R., Helm, B., Kallies, R., Berendonk, T. U., & Dalpke,  
568 A. (2021). *Evaluation of Two Methods to Concentrate SARS-CoV-2 from Untreated Wastewater*.  
569 1–7.

570 Gerrity, D., Papp, K., Stoker, M., Sims, A., & Frehner, W. (2021). Early-pandemic wastewater  
571 surveillance of SARS-CoV-2 in Southern Nevada: Methodology, occurrence, and  
572 incidence/prevalence considerations. *Water Research X*, 10, 100086.  
573 <https://doi.org/10.1016/j.wroa.2020.100086>

574 Gibas, C., Lambirth, K., Mittal, N., Islam, A., Bharati, V., Roppolo, L., Hinton, K., Lontai, J.,  
575 Stark, N., Young, I., Quach, C., Russ, M., Kauer, J., Nicolosi, B., Chen, D., Akella, S., Tang, W.,  
576 Schlueter, J., & Munir, M. (2021). Science of the Total Environment Implementing building-  
577 level SARS-CoV-2 wastewater surveillance on a university campus. *Science of the Total*  
578 *Environment*, 782, 146749. <https://doi.org/10.1016/j.scitotenv.2021.146749>

579 Gonçalves, J., Koritnik, T., Mio, V., Trkov, M., Bolje, M., Prosenc, K., Kotar, T., & Paragi, M.  
580 (2021). *Science of the Total Environment Detection of SARS-CoV-2 RNA in hospital wastewater*  
581 *from a low COVID-19 disease prevalence area*. 755, 4–10.  
582 <https://doi.org/10.1016/j.scitotenv.2020.143226>

583 Gonzalez, R. A., Larson, A., Thompson, H., Carter, E., & Cassi, X. F. (2021). Redesigning  
584 SARS-CoV-2 clinical RT-qPCR assays for wastewater RT-ddPCR. *MedRxiv*,  
585 2021.03.02.21252754. <https://doi.org/10.1101/2021.03.02.21252754>

586 Gonzalez, R., Curtis, K., Bivins, A., Bibby, K., Weir, M. H., Yetka, K., Thompson, H., Keeling,  
587 D., Mitchell, J., & Gonzalez, D. (2020). COVID-19 surveillance in Southeastern Virginia using  
588 wastewater-based epidemiology. *Water Research*, 186, 116296.  
589 <https://doi.org/10.1016/j.watres.2020.116296>

590 Graham, K. E., Loeb, S. K., Wolfe, M. K., Catoe, D., Sinnott-armstrong, N., Kim, S., Yamahara,  
591 K. M., Sassoubre, L. M., Grijalva, L. M. M., Roldan-hernandez, L., Langenfeld, K., Wigginton,  
592 K. R., & Boehm, A. B. (2021). SARS-CoV - 2 RNA in Wastewater Settled Solids Is Associated  
593 with COVID-19 Cases in a Large Urban Sewershed. *Environmental Science & Technology*.  
594 <https://doi.org/10.1021/acs.est.0c06191>

595 Haramoto, E., Malla, B., Thakali, O., & Kitajima, M. (2020). Science of the Total Environment  
596 First environmental surveillance for the presence of SARS-CoV-2 RNA in wastewater and river  
597 water in Japan. *Science of the Total Environment*, 737, 140405.  
598 <https://doi.org/10.1016/j.scitotenv.2020.140405>

599 Hasan, S. W., Ibrahim, Y., Daou, M., Kannout, H., Jan, N., Lopes, A., Alsafar, H., & Yousef, A.  
600 F. (2021). Science of the Total Environment Detection and quanti fi cation of SARS-CoV-2  
601 RNA in wastewater and treated ef fl uents : Surveillance of COVID-19 epidemic in the United  
602 Arab Emirates. *Science of the Total Environment*, 764, 142929.  
603 <https://doi.org/10.1016/j.scitotenv.2020.142929>

604 Hayden, R. T., Gu, Z., Ingersoll, J., Abdul-Ali, D., Shi, L., Pounds, S., & Caliendo, A. M.  
605 (2013). Comparison of droplet digital PCR to real-time PCR for quantitative detection of

606 cytomegalovirus. *Journal of Clinical Microbiology*, 51(2), 540–546.

607 <https://doi.org/10.1128/JCM.02620-12>

608 Hemalatha, M., Kiran, U., Kumar, S., Kopperi, H., Gokulan, C. G., Mohan, S. V., & Mishra, R.

609 K. (2021). Science of the Total Environment Surveillance of SARS-CoV-2 spread using

610 wastewater-based epidemiology : Comprehensive study. *Science of the Total Environment*, 768,

611 144704. <https://doi.org/10.1016/j.scitotenv.2020.144704>

612 Hillary, L. S., Farkas, K., Maher, K. H., Lucaci, A., Thorpe, J., Distaso, M. A., Gaze, W. H.,

613 Paterson, S., Burke, T., Connor, T. R., McDonald, J. E., Malham, S. K., & Jones, D. L. (2021).

614 Monitoring SARS-CoV-2 in municipal wastewater to evaluate the success of lockdown measures

615 for controlling COVID-19 in the UK. *Water Research*, 200, 117214.

616 <https://doi.org/10.1016/j.watres.2021.117214>

617 Juel, M. A. I., Stark, N., Nicolosi, B., Lontai, J., Lambirth, K., Schlueter, J., Gibas, C., & Munir,

618 M. (2021). Performance evaluation of virus concentration methods for implementing SARS-

619 CoV-2 wastewater based epidemiology emphasizing quick data turnaround. *Science of the Total*

620 *Environment*, 801, 149656. <https://doi.org/10.1016/j.scitotenv.2021.149656>

621 Kumar, M., Joshi, M., Patel, A. K., & Joshi, C. G. (2021). Unravelling the early warning

622 capability of wastewater surveillance for COVID-19: A temporal study on SARS-CoV-2 RNA

623 detection and need for the escalation. *Environmental Research*, 196(February), 110946.

624 <https://doi.org/10.1016/j.envres.2021.110946>

625 Kumar, M., Patel, A. K., Shah, A. V., Raval, J., Rajpara, N., Joshi, M., & Joshi, C. G. (2020).

626 First proof of the capability of wastewater surveillance for COVID-19 in India through detection

627 of genetic material of SARS-CoV-2. *Science of the Total Environment*, 746, 141326.

628 <https://doi.org/10.1016/j.scitotenv.2020.141326>



- 629 McHugh, M. L. (2012). Lessons in biostatistics interrater reliability : the kappa statistic.  
630 *Biochemica Medica*, 22(3), 276–282. <https://hrcak.srce.hr/89395>
- 631 Medema, G., Heijnen, L., Elsinga, G., Italiaander, R., & Medema, G. (2020). Presence of SARS-  
632 Coronavirus-2 in sewage . Methods Sewage samples. *MedRxiv*.  
633 <https://doi.org/https://doi.org/10.1101/2020.03.29.20045880>
- 634 Miyani, B., Fonoll, X., Norton, J., Mehrotra, A., & Xagorarakis, I. (2020). SARS-CoV-2 in  
635 Detroit Wastewater. *Journal of Environmental Engineering*, 146(11), 06020004.  
636 [https://doi.org/10.1061/\(asce\)ee.1943-7870.0001830](https://doi.org/10.1061/(asce)ee.1943-7870.0001830)
- 637 Murakami, M., Hata, A., Honda, R., & Watanabe, T. (2020). Letter to the Editor: Wastewater-  
638 Based Epidemiology Can Overcome Representativeness and Stigma Issues Related to COVID-  
639 19. *Environmental Science and Technology*, 54(9), 5311. <https://doi.org/10.1021/acs.est.0c02172>
- 640 Nemudryi, A., Nemudraia, A., Wiegand, T., Vanderwood, K. K., Wilkinson, R., Wiedenheft, B.,  
641 Nemudryi, A., Nemudraia, A., Wiegand, T., Surya, K., Buyukyoruk, M., & Cicha, C. (2020).  
642 Report Temporal Detection and Phylogenetic Assessment of SARS-CoV-2 in Municipal  
643 Wastewater II II Temporal Detection and Phylogenetic Assessment of SARS-CoV-2 in  
644 Municipal Wastewater. *Cell Reports Medicine*, 1(6), 100098.  
645 <https://doi.org/10.1016/j.xcrm.2020.100098>
- 646 Obermeier, P., Muehlhans, S., Hoppe, C., Karsch, K., Tief, F., Seeber, L., Chen, X., Conrad, T.,  
647 Boettcher, S., Diedrich, S., & Rath, B. (2016). Enabling Precision Medicine With Digital Case  
648 Classification at the Point-of-Care. *EBioMedicine*, 4, 191–196.  
649 <https://doi.org/10.1016/j.ebiom.2016.01.008>

650 Olesen, S. W., Imakaev, M., & Duvallet, C. (2021). Making waves: Defining the lead time of  
651 wastewater-based epidemiology for COVID-19. *Water Research*, 202, 117433.  
652 <https://doi.org/10.1016/j.watres.2021.117433>

653 Peccia, J., Zulli, A., Brackney, D. E., Grubaugh, N. D., Kaplan, E. H., Casanovas-massana, A.,  
654 Ko, A. I., Malik, A. A., Wang, D., Wang, M., Warren, J. L., Weinberger, D. M., Arnold, W., &  
655 Omer, S. B. (2020). Measurement of SARS-CoV-2 RNA in wastewater tracks community  
656 infection dynamics. *Nature Biotechnology*, 38(October). [https://doi.org/10.1038/s41587-020-](https://doi.org/10.1038/s41587-020-0684-z)  
657 0684-z

658 Pecson, B. M., Darby, E., Haas, C. N., Amha, Y. M., Bartolo, M., Danielson, R., Dearborn, Y.,  
659 Di Giovanni, G., Ferguson, C., Fevig, S., Gaddis, E., Gray, D., Lukasik, G., Mull, B., Olivas, L.,  
660 Olivieri, A., Qu, Y., & Sars-Cov-2 Interlaboratory Consortium. (2021). Reproducibility and  
661 sensitivity of 36 methods to quantify the SARS-CoV-2 genetic signal in raw wastewater:  
662 Findings from an interlaboratory methods evaluation in the U.S. *Environmental Science: Water*  
663 *Research and Technology*, 7(3), 504–520. <https://doi.org/10.1039/d0ew00946f>

664 Randazzo, W., Truchado, P., Cuevas-Ferrando, E., Simón, P., Allende, A., & Sánchez, G.  
665 (2020). SARS-CoV-2 RNA in wastewater anticipated COVID-19 occurrence in a low prevalence  
666 area. *Water Research*, 181. <https://doi.org/10.1016/j.watres.2020.115942>

667 Saguti, F., Magnil, E., Enache, L., Patzi, M., Johansson, A., Lumley, D., Davidsson, F., Dotevall,  
668 L., Mattsson, A., Trybala, E., Lagging, M., Lindh, M., Gisslén, M., Brezicka, T., Nyström, K., &  
669 Norder, H. (2021). *Surveillance of wastewater revealed peaks of SARS-CoV-2 preceding those of*  
670 *hospitalized patients with COVID-19*. 189. <https://doi.org/10.1016/j.watres.2020.116620>

671 Sherchan, S. P., Shahin, S., Ward, L. M., Tandukar, S., Aw, T. G., Schmitz, B., Ahmed, W., &  
672 Kitajima, M. (2020). Science of the Total Environment First detection of SARS-CoV-2 RNA in

673 wastewater in North America : A study in Louisiana , USA. *Science of the Total Environment*,  
674 743, 140621. <https://doi.org/10.1016/j.scitotenv.2020.140621>

675 Weidhaas, J., Aanderud, Z. T., Roper, D. K., Vanderslice, J., Brown, E., Ostermiller, J.,  
676 Hoffman, K., Jamal, R., Heck, P., Zhang, Y., Torgersen, K., Vander, J., & Lacross, N. (2021).  
677 Science of the Total Environment Correlation of SARS-CoV-2 RNA in wastewater with  
678 COVID-19 disease burden in sewersheds. *Science of the Total Environment*, 775, 145790.  
679 <https://doi.org/10.1016/j.scitotenv.2021.145790>

680 Westhaus, S., Weber, F., Schiwy, S., Linnemann, V., Brinkmann, M., Widera, M., Greve, C.,  
681 Janke, A., Hollert, H., Wintgens, T., & Ciesek, S. (2021). Science of the Total Environment  
682 Detection of SARS-CoV-2 in raw and treated wastewater in Germany – Suitability for COVID-  
683 19 surveillance and potential transmission risks. *Science of the Total Environment*, 751, 141750.  
684 <https://doi.org/10.1016/j.scitotenv.2020.141750>

685 WHO. (2020a). *Laboratory biosafety guidance related to coronavirus disease ( COVID-19 )*.  
686 *May*, 1–11.

687 WHO. (2020b). Responding to community spread of COVID-19. *Interim Guidance 7 March*,  
688 *March*, 1–6. [https://www.who.int/publications/i/item/responding-to-community-spread-of-covid-](https://www.who.int/publications/i/item/responding-to-community-spread-of-covid-19)  
689 19

690 Wurtzer, S., Marechal, V., Mouchel, J.-M., Maday, Y., Teyssou, R., Richard, E., Almayrac, J. L.,  
691 & Moulin, L. (2020). Evaluation of lockdown impact on SARS-CoV-2 dynamics through viral  
692 genome quantification in Paris wastewaters. *MedRxiv*, 2020.04.12.20062679.  
693 <https://doi.org/10.1101/2020.04.12.20062679>

694 Yan Bai, Yao, L., TaoWei, Tian, F., Jin, D.-Y., Chen, L., & MeiyunWang. (2020). Presumed  
695 Asymptomatic Carrier Transmission of COVID-19. *JAMA*, 382(13), 1199–1207.  
696 <https://doi.org/10.1056/nejmoa2001316>  
697 Zhao, L., Atoni, E., Nyaruaba, R., Du, Y., Zhang, H., Donde, O., Huang, D., Xiao, S., Ren, N.,  
698 Ma, T., Shu, Z., Yuan, Z., Tong, L., & Xia, H. (2021). Environmental surveillance of SARS-  
699 CoV-2 RNA in wastewater systems and related environments in Wuhan : April to May of 2020.  
700 *Journal of Environmental Sciences*, 0–17. <https://doi.org/10.1016/j.jes.2021.05.005>  
701
